# Supplementary material
Source: PubMed Central journal article supplement (PMC2964915)
Supplement: NIHMS32980-supplement-Erratum.pdf [file NIHMS32980-supplement-Erratum.pdf]

## Erratum

# A member of the cAMP receptor protein family of transcription regulators in *Mycobacterium tuberculosis* is required for virulence in mice and controls transcription of the *rpfA* gene coding for a resuscitation promoting factor

Lisa Rickman,<sup>1†</sup> Colin Scott,<sup>2‡</sup> Debbie M. Hunt,<sup>1</sup> Thomas Hutchinson,<sup>2</sup> M. Carmen Menéndez,<sup>1§</sup> Rachael Whalan,<sup>1</sup> Jason Hinds,<sup>3</sup> M. Joseph Colston,<sup>1¶</sup> Jeffrey Green<sup>2</sup> and Roger S. Buxton<sup>1\*</sup>

<sup>1</sup>Division of Mycobacterial Research, National Institute for Medical Research, Mill Hill, London NW7 1AA, UK.

<sup>2</sup>The Krebs Institute for Biomolecular Research, Department of Molecular Biology and Biotechnology, University of Sheffield, Western Bank, Sheffield S10 2TN, UK.

<sup>3</sup>Bacterial Microarray Group, Department of Medical Microbiology, St. George's Hospital Medical School, Cranmer Terrace, London SW17 0RE, UK.

In the article by Rickman *et al.* (2005), the present addresses of the authors were incorrect. The correct present addresses are listed below. We apologize for this error.

Present address: <sup>†</sup>The Wellcome Trust Sanger Institute, Wellcome Trust Genome Campus, Hinxton, Cambridge CB10 1SA, UK; <sup>‡</sup>CSIRO Entomology, Canberra, ACT 2601, Australia; <sup>§</sup>Departamento de Medicina Preventiva, Facultad de Medicina, Universidad Autónoma de Madrid, Arzobispo Morcillo, s/n. 28029-Madrid, Spain. <sup>¶</sup>Deceased 20 February 2003.

### Reference

Rickman, L., Scott, C., Hunt, D.M., Hutchinson, T., Menéndez, M.C., Whalan, R., *et al.* (2005) A member of the cAMP receptor protein family of transcription regulators in *Mycobacterium tuberculosis* is required for virulence in mice and controls transcription of the *rpfA* gene coding for a resuscitation promoting factor. *Mol Microbiol* **56**: 1274–1286.

\*For correspondence. E-mail rbuxton@nimr.mrc.ac.uk; Tel. (+44) 020 8816 2225; Fax (+44) 020 8906 4477.
